# Supplementary material
Source: PubMed Central journal article supplement (PMC2797056)
Supplement: emboj2009312s7.pdf [file emboj2009312s7.pdf]

Supplementary Table 1 Primer sequences for dsRNA synthesis

| Gene                                                                             | Primer 1 (5'-3')          | Primer 2 (5'-3')          |
|----------------------------------------------------------------------------------|---------------------------|---------------------------|
| EGFP                                                                             | ATGGTGAGCAAGGGCGAGGAGCTGT | TTACTTGTACAGCTCGTCCATGCCG |
| Trc                                                                              | TGTGATAGATTTTCGGATTCGG    | TACACGTACAAACGATTCGAGG    |
| Tor                                                                              | CAGGAGTTATTTTAAATGTGCTTCG | CCAAAATTCTTTGATCAGCTTAAAA |
| Rictor                                                                           | GCTTATTCCTAGACAGCATTATCCA | TTTTGAGTACTTCGATGCCTTTTAC |
| Sin1                                                                             | AAAAGAGTCCGGAAGAGTGACC    | CTGCTCTAAGTTTGGCTTCTCC    |
| Hpo                                                                              | GTACCTGGATCCTCCATAAACG    | CGAGATAGCCACTATTCTGTCCG   |
| Akt                                                                              | GTCAATAAACACAACCTTTCGACCT | AATATTTGAGTGAAATGAGGAACG  |
| Pkc98E                                                                           | GTATCTGGAACATCAGATCGCC    | GAGGTTCAATGTGAATCTTCCG    |
| T7 promoter sequences (TTAATACGACTCACTATAGGGAGA) were added to 5' end of primer. |                           |                           |
