# Supplementary material
Source: PubMed Central journal article supplement (PMC2797056)

**A**

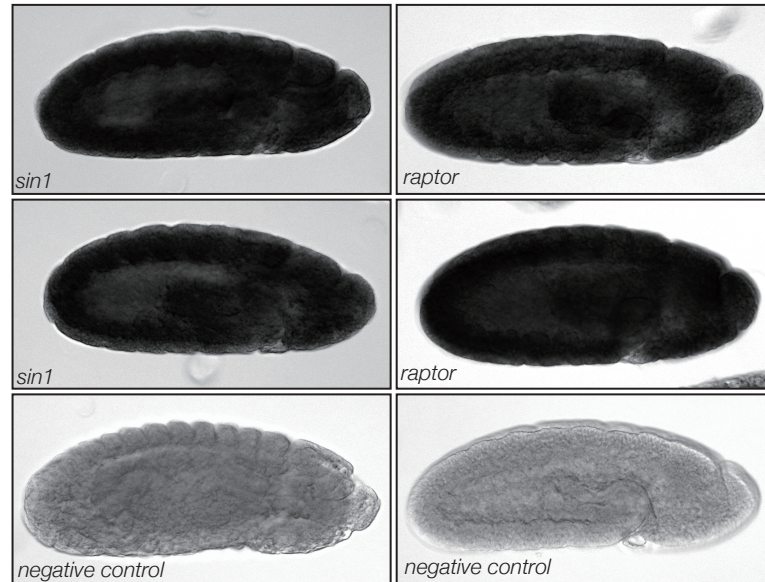

**B**

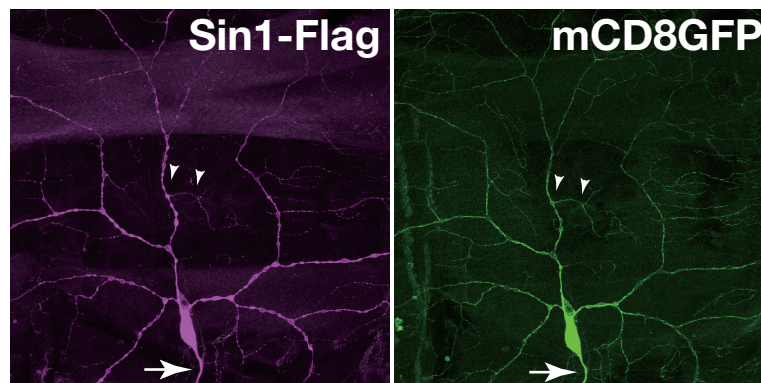

Supplement: emboj2009312s1.pdf [file emboj2009312s1.pdf]

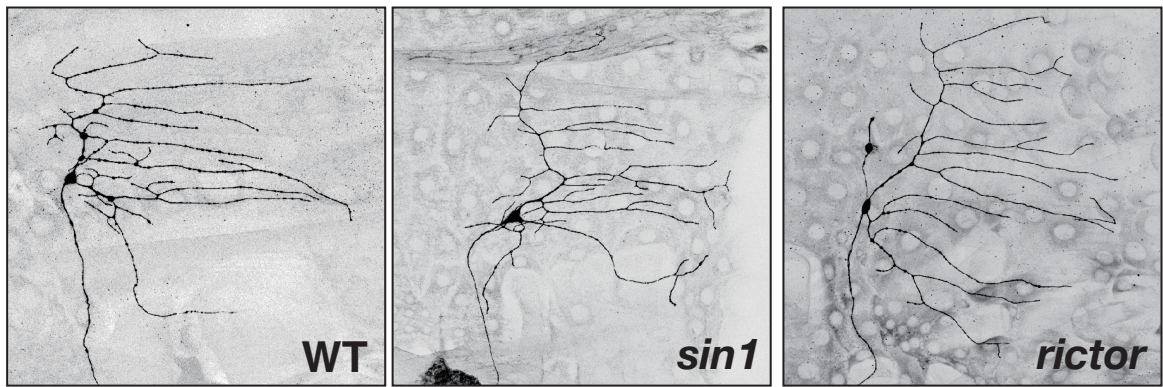

Supplement: emboj2009312s2.pdf [file emboj2009312s2.pdf]

**A**

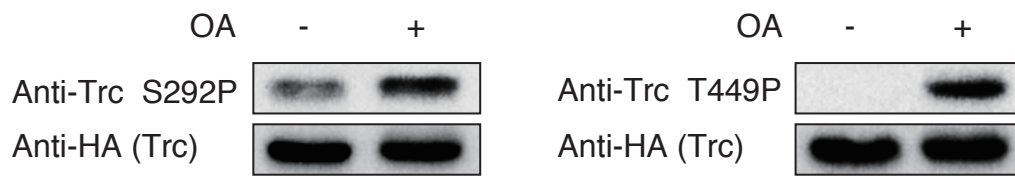

**B**

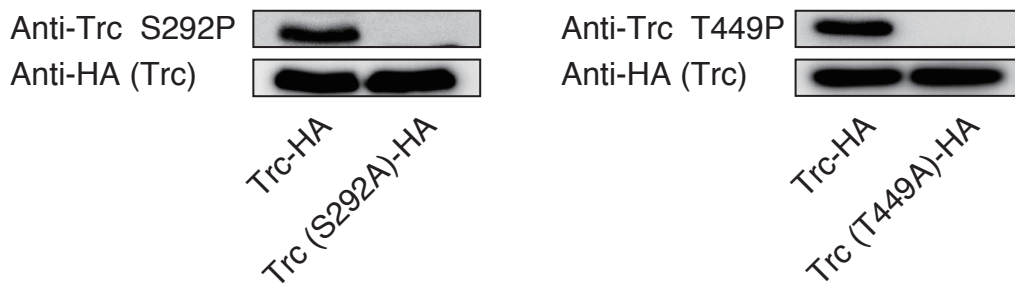

Supplement: emboj2009312s3.pdf [file emboj2009312s3.pdf]

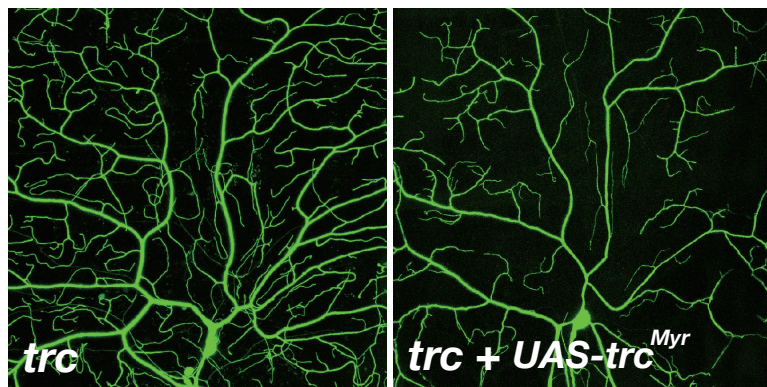

Supplement: emboj2009312s4.pdf [file emboj2009312s4.pdf]

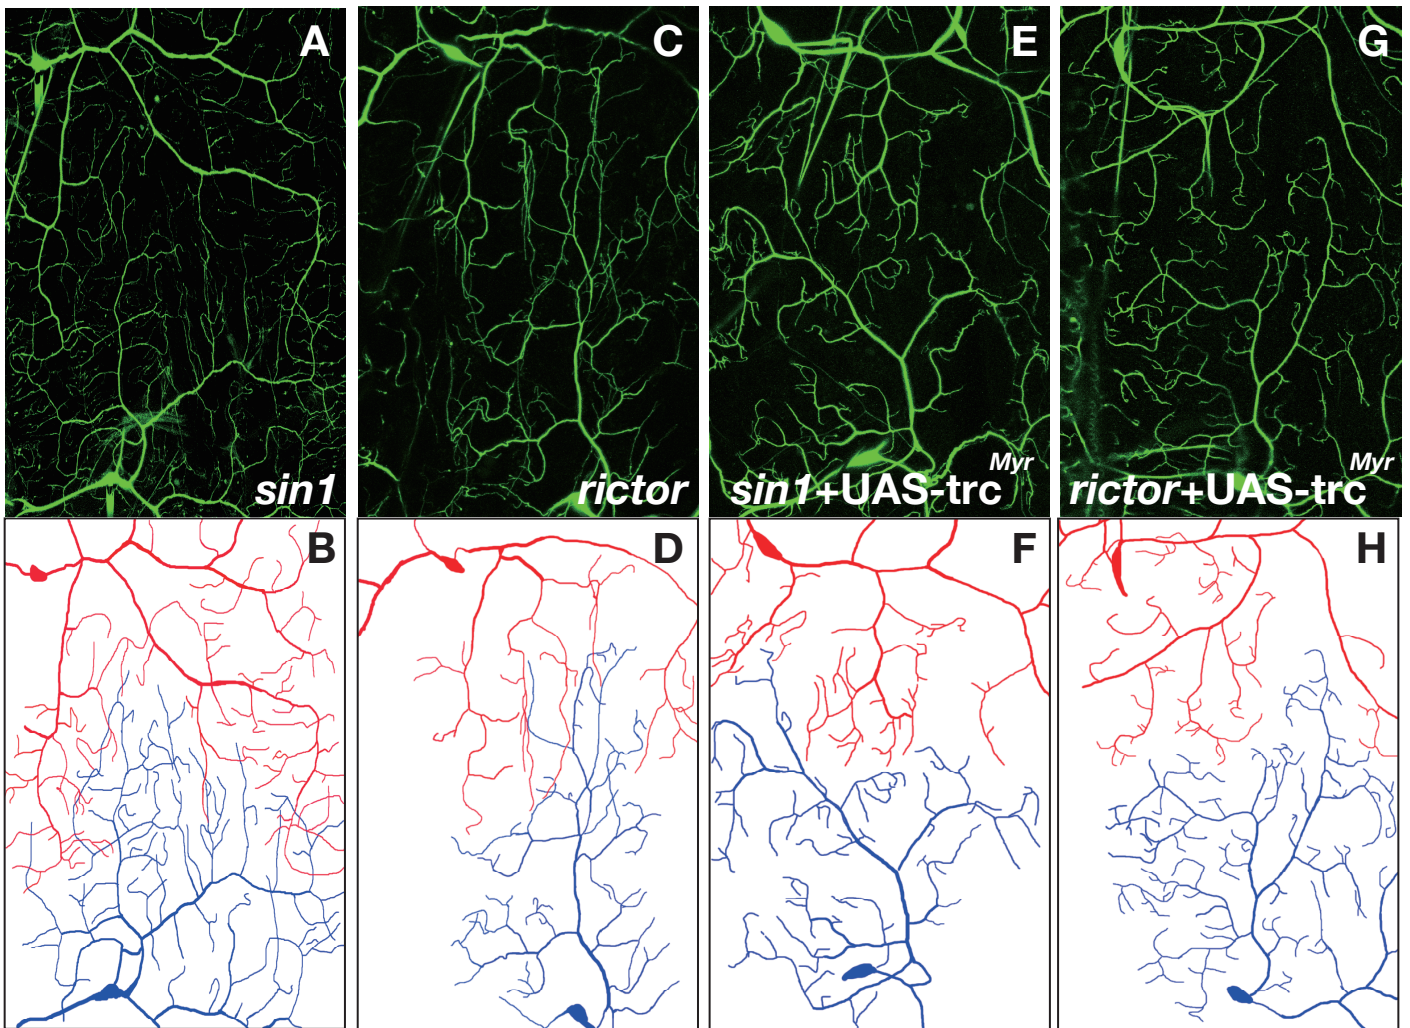

Supplementary Figure S5

Supplement: emboj2009312s5.pdf [file emboj2009312s5.pdf]

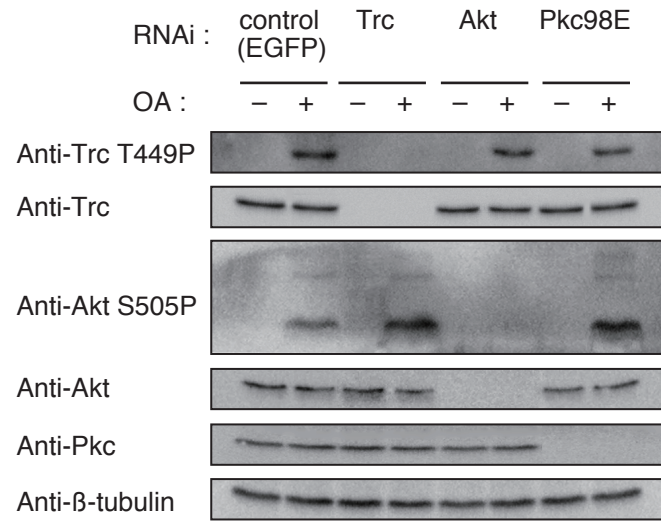

Supplement: emboj2009312s6.pdf [file emboj2009312s6.pdf]
